# Supplementary material for: Stabilizing the Exotic Carbonic Acid by Bisulfate Ion
Source: MDPI journal article supplement (doi:10.3390/molecules27010008), 2021-12-21
Supplement: s1 [file s1]

# Supplementary Materials

## Stabilizing the Exotic Carbonic Acid by Bisulfate Ion

Huili Lu <sup>1</sup>, Shi-Wei Liu <sup>2</sup>, Mengyang Li <sup>4</sup>, Baocai Xu <sup>3,\*</sup>, Li Zhao <sup>3</sup>, Tao Yang, <sup>4,\*</sup> and Gao-Lei Hou <sup>4,\*</sup>

<sup>1</sup> Master Kong Beverage R&D Center, Shanghai 201103, China; luhuili@masterkong.com.cn

<sup>2</sup> China National Research Institute of Food & Fermentation Industries Co., Ltd., Beijing 100015, China; ff\_nns@163.com

<sup>3</sup> School of Light Industry, Beijing Technology and Business University, Beijing 100048, China; zhaol@btbu.edu.cn

<sup>4</sup> MOE Key Laboratory for Non-Equilibrium Synthesis and Modulation of Condensed Matter, School of Physics, Xi'an Jiaotong University, Xi'an 710049, China; lmy0916@stu.xjtu.edu.cn

\* Correspondence: chemglhou@gmail.com (G.-L.H.); taoyang1@xjtu.edu.cn (T.Y.); xubaoc@btbu.edu.cn (B.X.)

### Table of Content

**Figure S1.** Three conformers of isolated carbonic acid molecule, bisulfate ion, and *cis-cis* sulfuric acid molecule.

**Figure S2.** Molecular orbitals of the optimized isomers of  $[\text{H}_2\text{CO}_3\cdot\text{HSO}_4]^-$ .

**Figure S3.** Intrinsic reaction coordinate (IRC) scan for the stepwise conversion of isomer **1** to isomer **4** via an intermediate state **in14**.

**Figure S4.** Animations showing the AIMD simulations for isomers **1** and **2a**.

**Figure S5.** Molecular graphs of  $[\text{H}_2\text{CO}_3\cdot\text{HSO}_4]^-$ .

**Figure S6.** Vibrational vectors for the selected vibrational modes of the isomers of  $[\text{H}_2\text{CO}_3\cdot\text{HSO}_4]^-$ .

**Figure S7.** Vibrational vectors for the imaginary vibrational modes of the transition states of  $[\text{H}_2\text{CO}_3\cdot\text{HSO}_4]^-$ .

**Table S1.** Charge distributions from natural population analysis for the different isomers of  $[\text{H}_2\text{CO}_3\cdot\text{HSO}_4]^-$ .

**Table S2.** Cartesian coordinates.

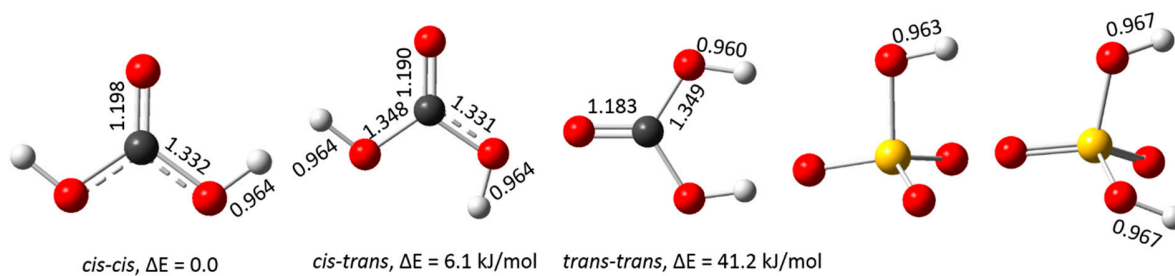

**Figure S1.** Three conformers of isolated carbonic acid molecule, bisulfate ion, and *cis-cis* sulfuric acid molecule at M06-2X/aug-cc-pVTZ level of theory. The bond lengths are shown in Å, and the relative stabilities of the three conformers of carbonic acid are obtained including zero-point energy corrections.

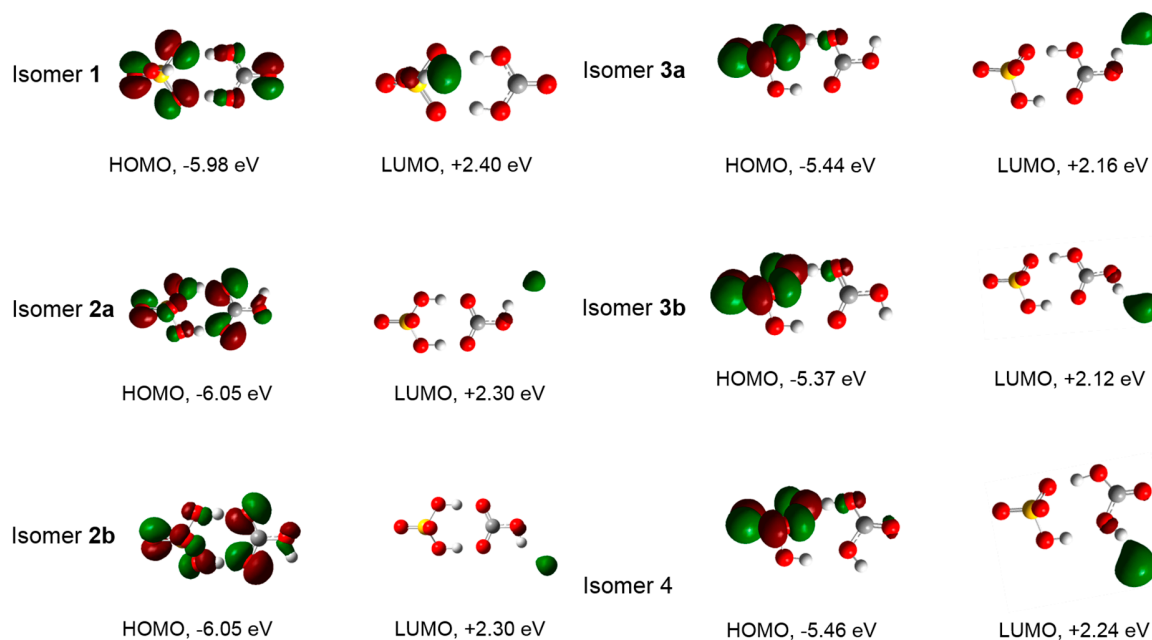

**Figure S2.** Highest occupied molecular orbitals (HOMOs) and lowest unoccupied molecular orbitals (LUMOs) of the optimized isomers of  $[\text{H}_2\text{CO}_3\cdot\text{HSO}_4]^-$  (isovalue = 0.04). Energy levels of the MOs are provided.

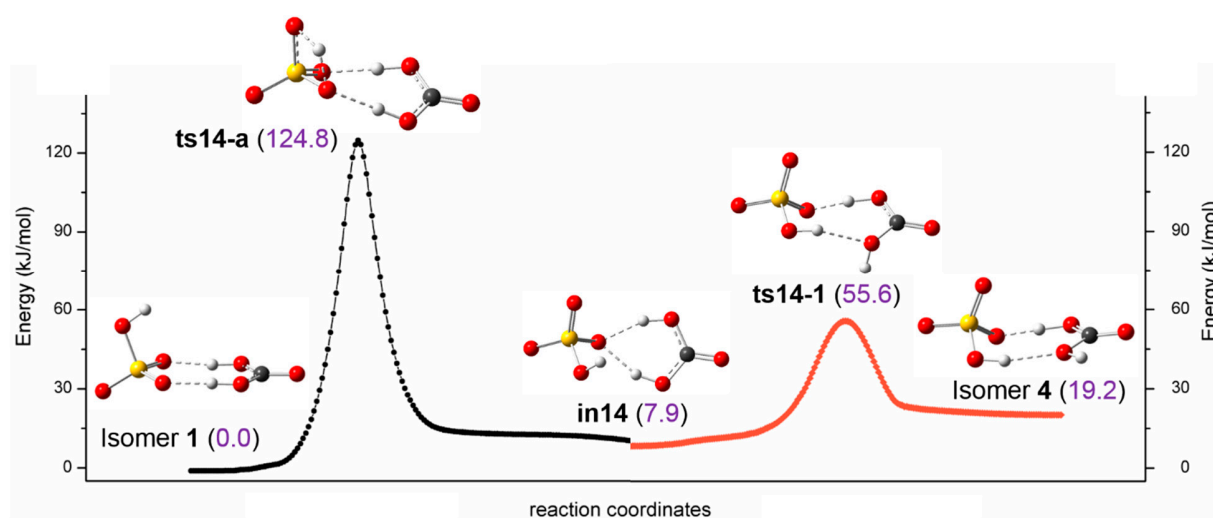

**Figure S3.** Intrinsic reaction coordinate (IRC) scan for the stepwise conversion of isomer **1** to isomer **4** via an intermediate state **in14**.

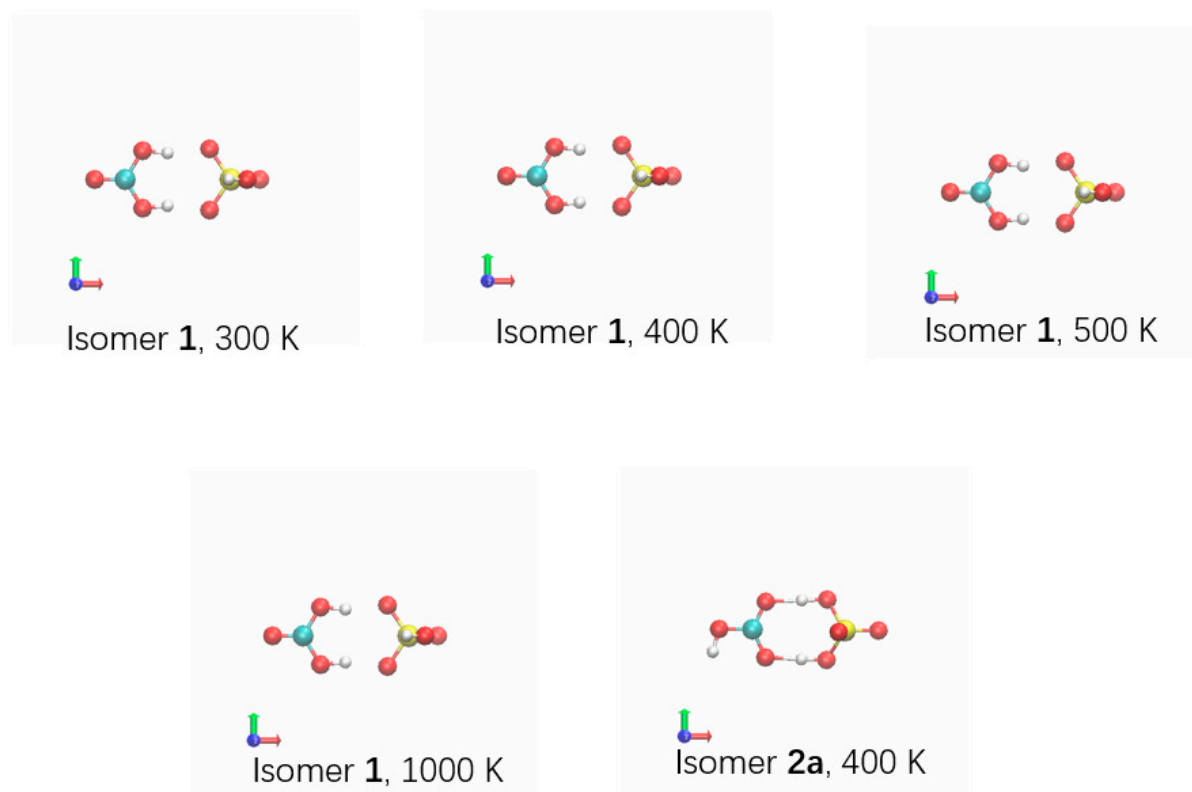

**Figure S4.** Animations showing the AIMD simulations for isomers **1** and **2a**. The total simulation time is 10 ps with a step of 1 fs (see in a separate .ppt file in display mode).

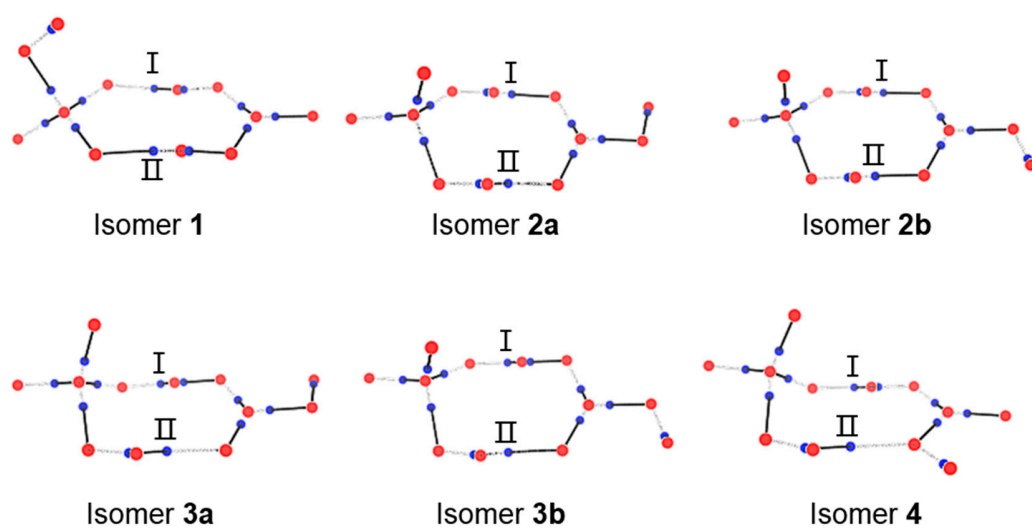

**Figure S5.** Molecular graphs of  $[\text{H}_2\text{CO}_3 \cdot \text{HSO}_4]^-$  showing the BCPs and the notation of hydrogen bonds I and II in each isomer.

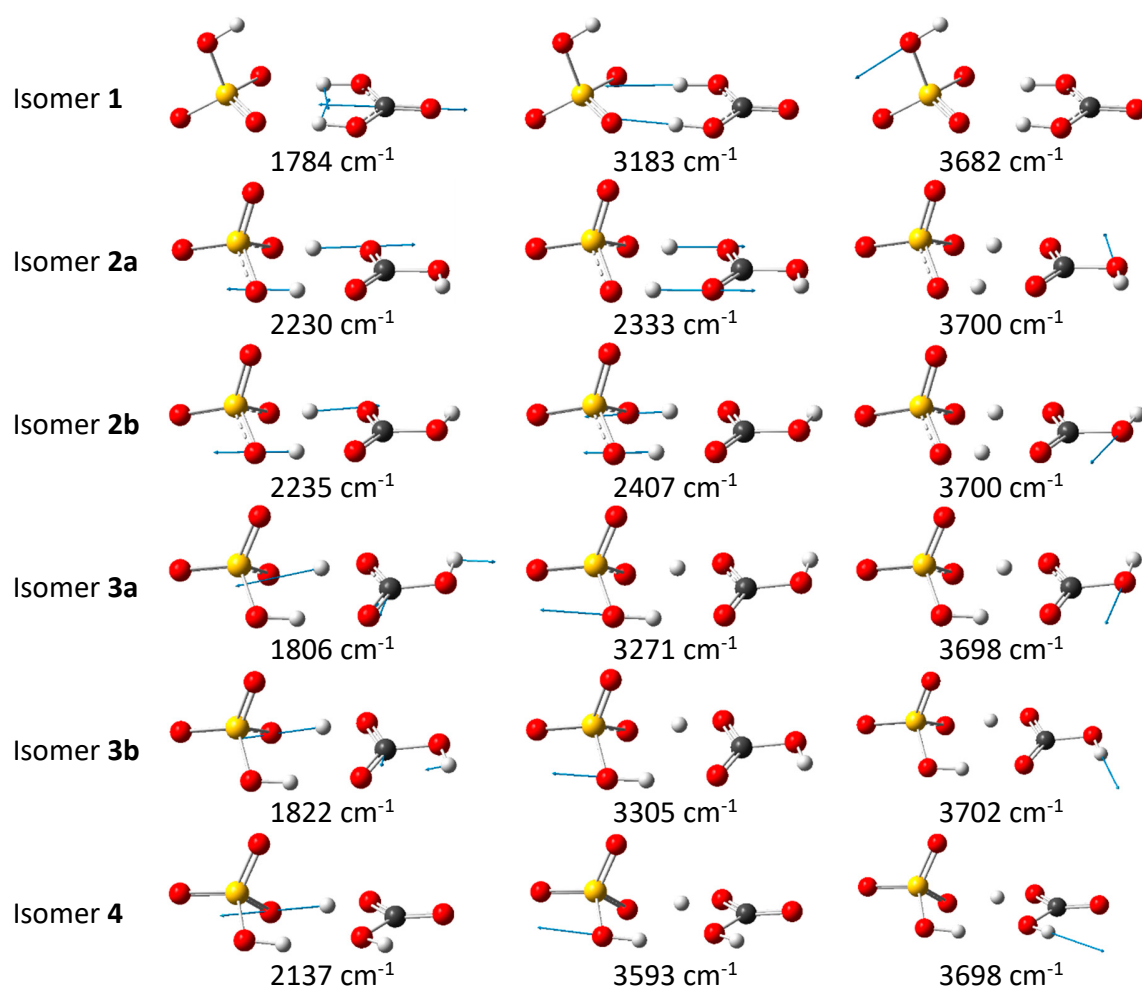

**Figure S6.** Vibrational vectors for the selected vibrational modes of the isomers of  $[\text{H}_2\text{CO}_3 \cdot \text{HSO}_4]^-$ .

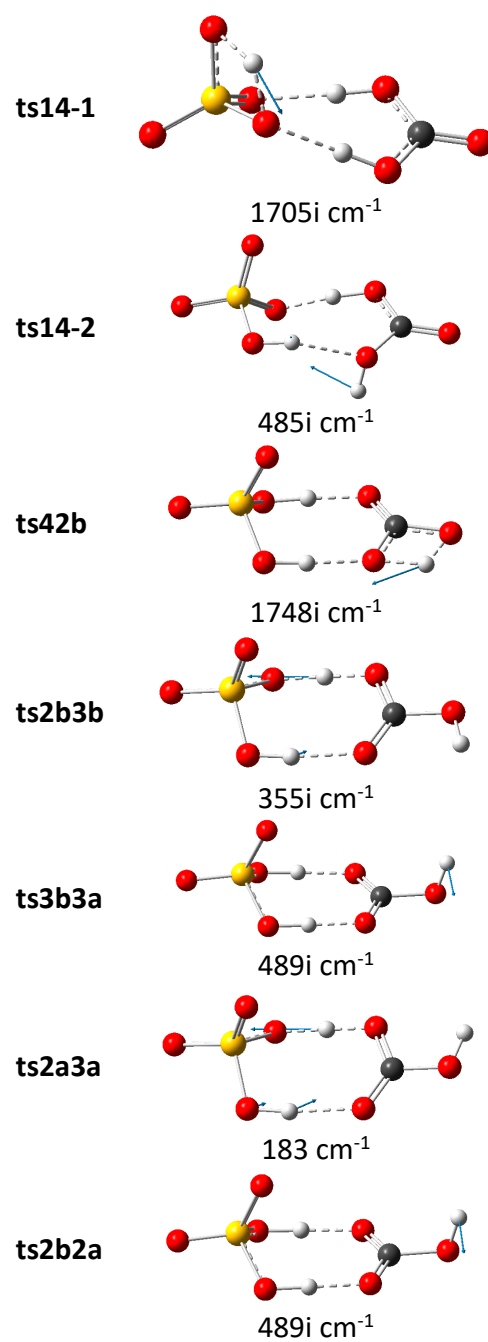

**Figure S7.** Vibrational vectors for the imaginary vibrational modes of the transition states of  $[\text{H}_2\text{CO}_3\cdot\text{HSO}_4]^-$ .

**Table S1.** Charge distributions from natural population analysis for the different isomers of  $[\text{H}_2\text{CO}_3\cdot\text{HSO}_4]^-$ .

| Isomers          | $\text{HSO}_4^-$ | $\text{H}_2\text{CO}_3$ |
|------------------|------------------|-------------------------|
| Isomer <b>1</b>  | -0.91            | -0.09                   |
| Isomer <b>2a</b> | -0.24            | -0.76                   |
| Isomer <b>2b</b> | -0.24            | -0.76                   |
| Isomer <b>3a</b> | -0.85            | -0.15                   |
| Isomer <b>3b</b> | -0.86            | -0.14                   |
| Isomer <b>4</b>  | -0.88            | -0.12                   |

**Table S2.** Cartesian coordinates for all the structures shown in Figures 1 and 2.

|                                 |             |             |             |                                 |             |             |             |
|---------------------------------|-------------|-------------|-------------|---------------------------------|-------------|-------------|-------------|
| <b>Isomer 1</b>                 |             |             |             | O                               | -3.51100500 | 0.02620800  | 0.24043800  |
| E(RM062X) = -964.851370409 A.U. |             |             |             | H                               | -3.73773100 | -0.90820800 | 0.28207000  |
| S                               | 1.57786100  | 0.00005300  | -0.12358600 | <b>Isomer 3b</b>                |             |             |             |
| O                               | 2.73365800  | 0.00043400  | -0.98156700 | E(RM062X) = -964.848570260 A.U. |             |             |             |
| O                               | 0.74379900  | -1.21045400 | -0.17115500 | S                               | 1.54588600  | -0.06060800 | 0.07858200  |
| O                               | 2.22691500  | -0.00065500 | 1.36884900  | O                               | 2.93952400  | -0.12294900 | -0.29263700 |
| H                               | 1.49524100  | -0.00053300 | 1.99640400  | O                               | 0.70896700  | -1.02312300 | -0.72139500 |
| O                               | 0.74383900  | 1.21064000  | -0.16995900 | O                               | 1.22889600  | -0.14588900 | 1.49314800  |
| H                               | -0.92379400 | 1.04698400  | -0.11998400 | H                               | -0.57287500 | -1.07663900 | -0.39760300 |
| C                               | -2.59805600 | -0.00000600 | -0.00298600 | O                               | 1.05413100  | 1.37877700  | -0.42647800 |
| O                               | -1.90678600 | 1.13648500  | -0.05017600 | H                               | 0.07678600  | 1.39630000  | -0.32417000 |
| O                               | -3.79783300 | -0.00003300 | 0.08409600  | C                               | -2.19095900 | 0.00535600  | -0.05507400 |
| O                               | -1.90673200 | -1.13646100 | -0.05018300 | O                               | -1.65566200 | -1.14559000 | -0.18174000 |
| H                               | -0.92376500 | -1.04691200 | -0.12037000 | O                               | -1.66942400 | 1.10835600  | -0.16136700 |
| <b>Isomer 2a</b>                |             |             |             | O                               | -3.51652700 | -0.07674300 | 0.22580500  |
| E(RM062X) = -964.849443144 A.U. |             |             |             | H                               | -3.81156600 | 0.83521300  | 0.31222300  |
| S                               | 1.54530600  | -0.00988400 | 0.08629200  | <b>Isomer 4</b>                 |             |             |             |
| O                               | 2.90742600  | -0.00724300 | -0.37552900 | E(RM062X) = -964.843719843 A.U. |             |             |             |
| O                               | 0.81334200  | -1.19796100 | -0.60857500 | S                               | 1.55221000  | -0.08687500 | 0.08315700  |
| O                               | 1.30181800  | -0.06755100 | 1.50965700  | O                               | 2.95289700  | -0.27230500 | -0.21359400 |
| H                               | -0.20686100 | -1.17030900 | -0.39387800 | O                               | 0.66306800  | -0.97415500 | -0.72463900 |
| O                               | 0.84164800  | 1.24630800  | -0.50879800 | O                               | 1.16566700  | -0.06822300 | 1.48262000  |
| H                               | -0.18629400 | 1.21681400  | -0.32531900 | H                               | -2.24103200 | 1.77638900  | 0.03789900  |
| C                               | -2.17038200 | 0.04166600  | -0.04685500 | O                               | 1.22665400  | 1.39304700  | -0.49561700 |
| O                               | -1.65173000 | -1.09508400 | -0.15175700 | H                               | 0.26424600  | 1.48842900  | -0.42754700 |
| O                               | -1.63573700 | 1.15760300  | -0.13082100 | C                               | -2.40737700 | -0.08757300 | -0.01335400 |
| O                               | -3.51866900 | 0.05547300  | 0.18859200  | O                               | -1.64637000 | 1.04741600  | -0.16670400 |
| H                               | -3.77422500 | -0.87070900 | 0.23750200  | O                               | -3.58002500 | 0.00998700  | 0.25779300  |
| <b>Isomer 2b</b>                |             |             |             | O                               | -1.74461400 | -1.17386900 | -0.19913100 |
| E(RM062X) = -964.849443254 A.U. |             |             |             | H                               | -0.71251800 | -1.04456500 | -0.38656800 |
| S                               | -1.54534500 | -0.00995200 | 0.08624500  | <b>ts14-1</b>                   |             |             |             |
| O                               | -2.90737900 | -0.00742100 | -0.37583500 | E(RM062X) = -964.803840151 A.U. |             |             |             |
| O                               | -0.84185100 | 1.24661200  | -0.50835900 | S                               | -1.61841300 | 0.07241100  | -0.09732000 |
| O                               | -1.30213800 | -0.06794500 | 1.50964600  | O                               | -2.72563900 | -0.22853600 | -0.96881600 |
| H                               | 0.18602400  | 1.21704100  | -0.32502100 | O                               | -0.71187400 | 1.10961900  | -0.59375100 |
| O                               | -0.81300100 | -1.19763200 | -0.60880400 | O                               | -2.01616800 | 0.28145100  | 1.37715500  |
| H                               | 0.20725100  | -1.17003200 | -0.39383200 | H                               | -1.26720000 | -0.74912000 | 1.37383700  |
| C                               | 2.17042800  | 0.04168700  | -0.04678400 | O                               | -0.77551900 | -1.19298200 | 0.31556000  |
| O                               | 1.63570500  | 1.15757000  | -0.13062500 | H                               | 0.91234800  | -1.05789300 | -0.12000800 |
| O                               | 1.65180900  | -1.09511600 | -0.15155800 | C                               | 2.55911400  | -0.00214200 | -0.02057300 |
| O                               | 3.51876900  | 0.05552500  | 0.18834300  | O                               | 1.87620300  | -1.11463100 | -0.30279600 |
| H                               | 3.77437000  | -0.87064700 | 0.23717400  | O                               | 3.75894300  | 0.00007800  | 0.03004800  |
| <b>Isomer 3a</b>                |             |             |             | O                               | 1.84400800  | 1.09794400  | 0.20395400  |
| E(RM062X) = -964.848187314 A.U. |             |             |             | H                               | 0.89513900  | 1.03774200  | -0.06410700 |
| S                               | 1.54082000  | -0.07417000 | 0.07768200  | <b>ts14-2</b>                   |             |             |             |
| O                               | 2.93307800  | -0.13958500 | -0.29609300 | E(RM062X) = -964.830179989 A.U. |             |             |             |
| O                               | 0.69395600  | -0.99342600 | -0.76897600 | S                               | 1.59088100  | -0.10344600 | 0.01747200  |
| O                               | 1.21874800  | -0.22686800 | 1.48503500  | O                               | 2.89132900  | -0.02244200 | -0.60450200 |
| H                               | -0.56058800 | -1.02886600 | -0.44499500 | O                               | 0.54943500  | -0.68075600 | -0.88287000 |
| O                               | 1.06545700  | 1.38803900  | -0.36170200 | O                               | 1.52565000  | -0.67234400 | 1.35147500  |
| H                               | 0.08585800  | 1.41748900  | -0.26607200 | H                               | 0.21051700  | 1.43609900  | 0.44203900  |
| C                               | -2.18647200 | 0.08518400  | -0.05531200 | O                               | 1.14075100  | 1.44987300  | 0.16762500  |
| O                               | -1.65887400 | -1.07957200 | -0.21561700 | H                               | -1.68793300 | 1.45052900  | -0.90392600 |
| O                               | -1.65658800 | 1.17460500  | -0.14334100 | C                               | -2.47794600 | -0.06999700 | 0.00489500  |



|   |             |             |             |
|---|-------------|-------------|-------------|
| O | -1.71636000 | 1.10518000  | -0.00610400 |
| O | -3.66848800 | -0.01727500 | 0.13038400  |
| O | -1.76502900 | -1.14454700 | -0.09396300 |
| H | -0.76729400 | -0.95300900 | -0.34338300 |

#### in14

E(RM062X) = -964.848348869 A.U.

|   |             |             |             |
|---|-------------|-------------|-------------|
| S | 1.65018400  | -0.08215900 | -0.05581900 |
| O | 2.80207500  | 0.40321200  | -0.77470300 |
| O | 0.41126800  | -0.08654100 | -0.88028500 |
| O | 1.79666800  | -1.30559000 | 0.71413900  |
| H | 0.89497700  | 0.65276800  | 1.78299000  |
| O | 1.36419200  | 1.07964900  | 1.05709100  |
| H | -0.97179700 | 0.89381500  | -0.51124300 |
| C | -2.60155600 | 0.00172000  | -0.01607100 |
| O | -1.89721000 | 1.11147800  | -0.25896000 |
| O | -3.75987100 | 0.03758400  | 0.29449000  |
| O | -1.93217600 | -1.14684900 | -0.13734900 |
| H | -0.99634100 | -0.98591000 | -0.39760300 |

#### ts42b

E(RM062X) = -964.798627058 A.U.

|   |             |             |             |
|---|-------------|-------------|-------------|
| S | 1.52822500  | -0.00420800 | 0.09129200  |
| O | 2.90332300  | -0.02454300 | -0.32227900 |
| O | 0.78075700  | -1.13760000 | -0.65608600 |
| O | 1.21948200  | -0.06262300 | 1.49960900  |
| H | -2.86272100 | 1.20754400  | 0.07035200  |
| O | 0.89914900  | 1.30713500  | -0.51078900 |
| H | -0.09478800 | 1.29125000  | -0.35513100 |
| C | -2.22698500 | -0.16268300 | -0.03093200 |
| O | -1.66914600 | 1.04586100  | -0.17267700 |
| O | -3.47221800 | 0.08517900  | 0.21206100  |
| O | -1.64776700 | -1.24701500 | -0.12439200 |
| H | -0.24082600 | -1.18652400 | -0.39386200 |

#### ts2b3b

E(RM062X) = -964.848397358 A.U.

|   |             |             |             |
|---|-------------|-------------|-------------|
| S | -1.79487177 | 0.75091574  | 0.00000000  |
| O | -0.41917277 | 0.70621074  | -0.42840400 |
| O | -2.62743377 | -0.26576726 | -0.76297900 |
| O | -2.06093377 | 0.66384774  | 1.42221700  |
| H | -3.80268277 | -0.29253426 | -0.46526600 |
| O | -2.35342277 | 2.14966574  | -0.51172500 |
| H | -3.33939977 | 2.13916374  | -0.39068500 |
| C | -5.51374777 | 0.78614674  | -0.12952300 |
| O | -4.97190477 | -0.35070926 | -0.23890700 |
| O | -4.99758877 | 1.90179874  | -0.22680400 |
| O | -6.84983077 | 0.71851974  | 0.12314900  |
| H | -7.13703777 | 1.63403174  | 0.19611300  |

#### ts3b3a

E(RM062X) = -964.833679988 A.U.

|   |             |             |             |
|---|-------------|-------------|-------------|
| S | 1.50268000  | -0.07607100 | 0.10158500  |
| O | 2.93284400  | -0.18127400 | -0.06464100 |
| O | 0.75116200  | -0.98057000 | -0.83307900 |
| O | 0.97929600  | -0.17877800 | 1.45443100  |
| H | -0.57636200 | -1.04466200 | -0.56319800 |
| O | 1.14181200  | 1.39781100  | -0.42209700 |
| H | 0.16403300  | 1.46010100  | -0.40634500 |
| C | -2.14362700 | 0.05189600  | -0.11413100 |

|   |             |             |             |
|---|-------------|-------------|-------------|
| O | -1.63773800 | -1.10721300 | -0.32968700 |
| O | -1.62367000 | 1.13596000  | -0.27329100 |
| O | -3.45783200 | -0.01950700 | 0.31279100  |
| H | -3.45577600 | -0.04110600 | 1.27354600  |

#### ts2a3a

E(RM062X) = -964.848162833 A.U.

|   |             |             |             |
|---|-------------|-------------|-------------|
| S | 1.53955700  | -0.06592800 | 0.07835300  |
| O | 2.92209600  | -0.12250400 | -0.32748600 |
| O | 0.69141500  | -1.01352100 | -0.74840900 |
| O | 1.24679500  | -0.21863000 | 1.49058300  |
| H | -0.50684600 | -1.03639500 | -0.43689900 |
| O | 1.02981100  | 1.37643200  | -0.36614000 |
| H | 0.04507100  | 1.39024000  | -0.26367100 |
| C | -2.17909900 | 0.07799600  | -0.05275200 |
| O | -1.64975700 | -1.08068400 | -0.20097400 |
| O | -1.65014500 | 1.17267200  | -0.13625600 |
| O | -3.50983800 | 0.02851500  | 0.22596500  |
| H | -3.73956100 | -0.90519700 | 0.26518200  |

#### ts2b2a

E(RM062X) = -964.834078851 A.U.

|   |             |             |             |
|---|-------------|-------------|-------------|
| S | 1.53128000  | -0.00026500 | 0.10236800  |
| O | 2.91916200  | -0.00074700 | -0.27350300 |
| O | 0.85198300  | -1.22188700 | -0.58605400 |
| O | 1.19737500  | -0.00037900 | 1.50891400  |
| H | -0.17914900 | -1.19541500 | -0.42241300 |
| O | 0.85360100  | 1.22321300  | -0.58519600 |
| H | -0.17680000 | 1.19714600  | -0.42219000 |
| C | -2.14993200 | 0.00016300  | -0.09207200 |
| O | -1.62750300 | -1.12092500 | -0.21354700 |
| O | -1.62753200 | 1.12107100  | -0.21325400 |
| O | -3.52016900 | -0.00010600 | 0.18948900  |
| H | -3.62027200 | -0.00040200 | 1.14435200  |
